# Supplementary material for: A versatile strategy to the selective synthesis of Cu nanocrystals and the in situ conversion to CuRu nanotubes
Source: Royal Society of Chemistry journal article supplement (doi:10.1039/c3nr01290e), 2013-01-01
Supplement: c3nr01290e.pdf [file c3nr01290e.pdf]

## Supporting information for

### A Versatile Strategy to Selective Synthesis of Cu Nanocrystals and The *in situ* Conversion to CuRu Nanotubes

Xiaoqing Huang,<sup>†</sup> Yu Chen,<sup>†</sup> Chin-Yi Chiu,<sup>†</sup> Hua Zhang,<sup>†</sup> Yuxi Xu,<sup>‡</sup> Xiangfeng Duan,<sup>§§</sup> and Yu Huang<sup>\*\*§</sup>  
Email: yhuang@seas.ucla.edu

#### Experimental Details

**Chemicals:** Copper(II) acetylacetonate ( $\text{Cu}(\text{acac})_2$ ,  $\geq 99.99\%$ ), Ruthenium(III) chloride hydrate ( $\text{RuCl}_3 \cdot \text{H}_2\text{O}$ , 99.98%), Iron(III) chloride hexahydrate ( $\text{FeCl}_3 \cdot 6\text{H}_2\text{O}$ ,  $\geq 99\%$ ), Iron(II) chloride tetrahydrate ( $\text{FeCl}_2 \cdot 4\text{H}_2\text{O}$ ,  $\geq 99.0\%$ ), Ammonium chloride ( $\text{NH}_4\text{Cl}$ , 99.99%), Hexadecyltrimethylammonium chloride ( $\text{CH}_3(\text{CH}_2)_{15}\text{N}(\text{Cl})(\text{CH}_3)_3$ , CTAC,  $>98.0\%$ ), Poly(vinyl pyrrolidone) (PVP,  $\text{MW} \approx 55000$ ), Benzyl alcohol ( $\text{C}_6\text{H}_5\text{CH}_2\text{OH}$ , 99.8%), Formaldehyde ( $\text{HCHO}$ , 36.5-38% in  $\text{H}_2\text{O}$ ), Ascorbic acid ( $\text{C}_6\text{H}_8\text{O}_6$ , AA, reagent grade), and Oleylamine ( $\text{CH}_3(\text{CH}_2)_7\text{CH}=\text{CH}(\text{CH}_2)_7\text{CH}_2\text{NH}_2$ , 70%) were all purchased from Sigma-Aldrich. All the chemicals were used as received without further purification. The water (18  $\text{M}\Omega/\text{cm}$ ) used in all experiments was prepared by passing through an ultra pure purification system (Aqua Solutions).

**Synthesis of Cu nanocubes:** In a typical synthesis of Cu nanocubes, Copper (II) acetylacetonate ( $\text{Cu}(\text{acac})_2$ , 13.3 mg), Ammonium chloride ( $\text{NH}_4\text{Cl}$ , 0.27 mg), Ascorbic acid ( $\text{C}_6\text{H}_8\text{O}_6$ , 52.8 mg) and 5 mL Oleylamine were added into a vial. After the vial had been capped, the mixture was ultrasonicated for around 15 minutes. The resulting homogeneous mixture was then heated from room temperature to 170 °C in 15 min and kept at 170 °C for 3 hours in an oil bath before it was cooled to room temperature. The resulting colloidal products were collected by centrifugation and washed three times with a hexane/ethanol mixture.

**Synthesis of Cu nanowires:** In a typical synthesis of Cu nanowires, Copper (II) acetylacetonate ( $\text{Cu}(\text{acac})_2$ , 13.3 mg), Ruthenium(III) chloride hydrate ( $\text{RuCl}_3 \cdot \text{H}_2\text{O}$ , 10.5 mg), Ascorbic acid ( $\text{C}_6\text{H}_8\text{O}_6$ , 52.8 mg) and 5 mL Oleylamine were added into a vial. After the vial had been capped, the mixture was ultrasonicated for around 15 minutes. The resulting homogeneous mixture was then heated from room temperature to 170 °C in 15 min and kept at 170 °C for 3 hours in an oil bath before it was cooled to room temperature. The resulting colloidal products were collected by centrifugation and washed three times with a hexane/ethanol mixture.

**Synthesis of CuRu nanotubes:** Typically, Copper (II) acetylacetonate ( $\text{Cu}(\text{acac})_2$ , 13.3 mg), Ruthenium(III) chloride hydrate ( $\text{RuCl}_3 \cdot \text{H}_2\text{O}$ , 10.5 mg), Ascorbic acid ( $\text{C}_6\text{H}_8\text{O}_6$ , 52.8 mg) and 5 mL Oleylamine were added into a vial. After the vial had been capped, the mixture was ultrasonicated for around 15 minutes. The resulting homogeneous mixture was then heated from room temperature to 170 °C in 15 min and kept at 170 °C for 3 hours in an oil bath. After that, the mixture was further heated from 170 °C to 210 °C in 10 min and kept at 210 °C for 12 hours. The resulting colloidal products were collected by centrifugation and washed three times with a hexane/ethanol mixture.

**Synthesis of hydrophilic Cu nanowires and nanocubes:** In a typical synthesis of hydrophilic Cu nanowires, Copper (II) acetylacetonate ( $\text{Cu}(\text{acac})_2$ , 13.3 mg), Iron(III) chloride hexahydrate ( $\text{FeCl}_3$ , 0.135 mg), poly(vinylpyrrolidone) (PVP, 80.0 mg) and 0.2 mL formaldehyde solution (36.5-38% in  $\text{H}_2\text{O}$ ) were mixed together with 5 mL benzyl alcohol. After the vial had been capped, the mixture was ultrasonicated for around 15 minutes. The resulting homogeneous solution was transferred to a 20-mL Teflon-lined stainless-steel autoclave. The sealed vessel was then heated at 200 °C for 5 h before it was cooled to room temperature. The products were precipitated by acetone, separated via centrifugation and further purified by an ethanol-acetone mixture. The synthesis of Cu nanocubes was similar to that of nanowires except that  $\text{FeCl}_3$  was replaced with  $\text{NH}_4\text{Cl}$ .

**Characterization:** TEM images were carried out on a FEI CM120 transmission electron microscope operated at 120 kV. High resolution TEM images and the high-angle annular dark-field scanning transmission electron microscope (HAADF-STEM)-energy-dispersive X-ray spectroscopy (EDS) were taken on a FEI TITAN transmission electron microscope operated at 300 kV. The samples were prepared by dropping hexane dispersion of samples onto carbon-coated copper TEM grids (Ted Pella, Redding, CA) using pipettes and dried under ambient condition. Scanning electron microscopic (SEM) images were taken on a JEOL JSM-6700F with field emission gun. X-ray powder diffraction patterns were collected on a Panalytical X'Pert Pro X-ray Powder Diffractometer with  $\text{Cu-K}\alpha$  radiation. The mole ratio of nanostructures was determined by the inductively coupled plasma atomic emission spectroscopy (TJA RADIAL IRIS 1000 ICP-AES).

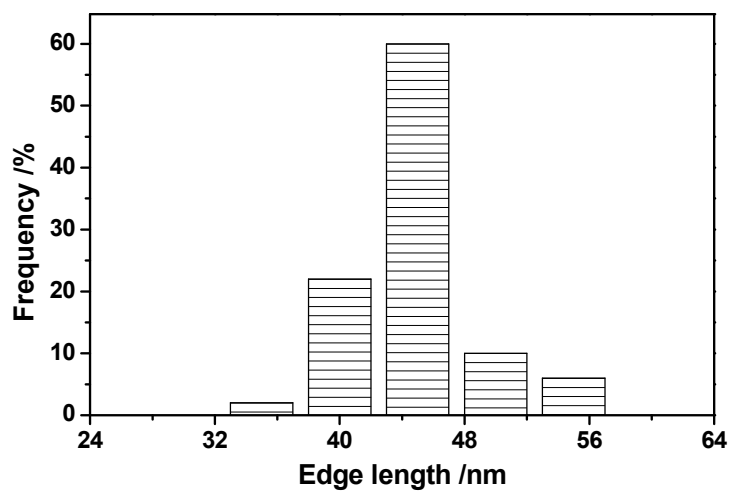

**Figure S1.** Edge length distribution of the Cu nanocubes shown in Figure 1.

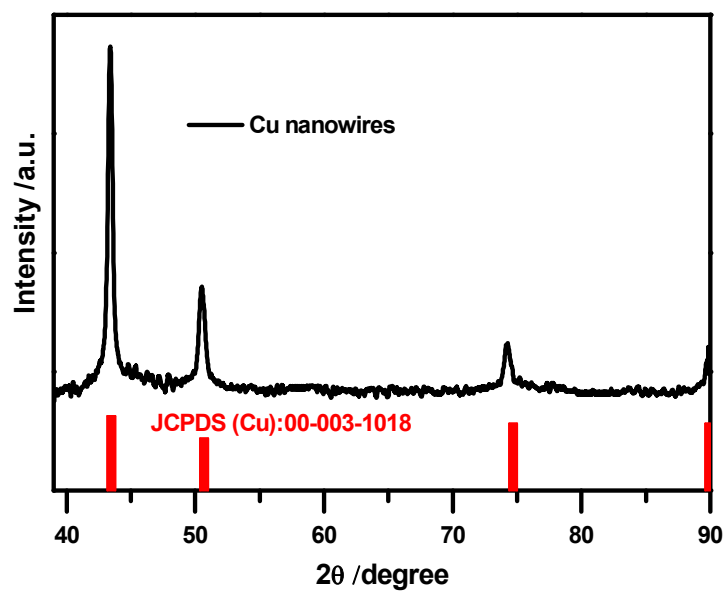

**Figure S2.** Representative XRD pattern of the ultralong Cu nanowires.

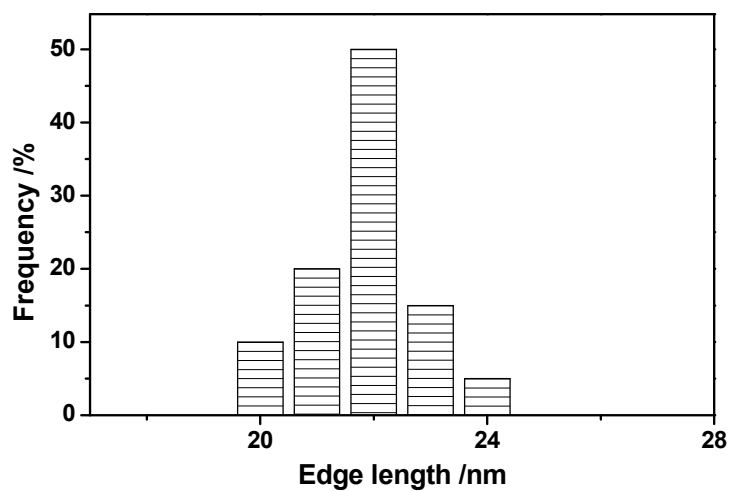

**Figure S3.** Diameter distribution of the Cu nanowires shown in Figure 2.

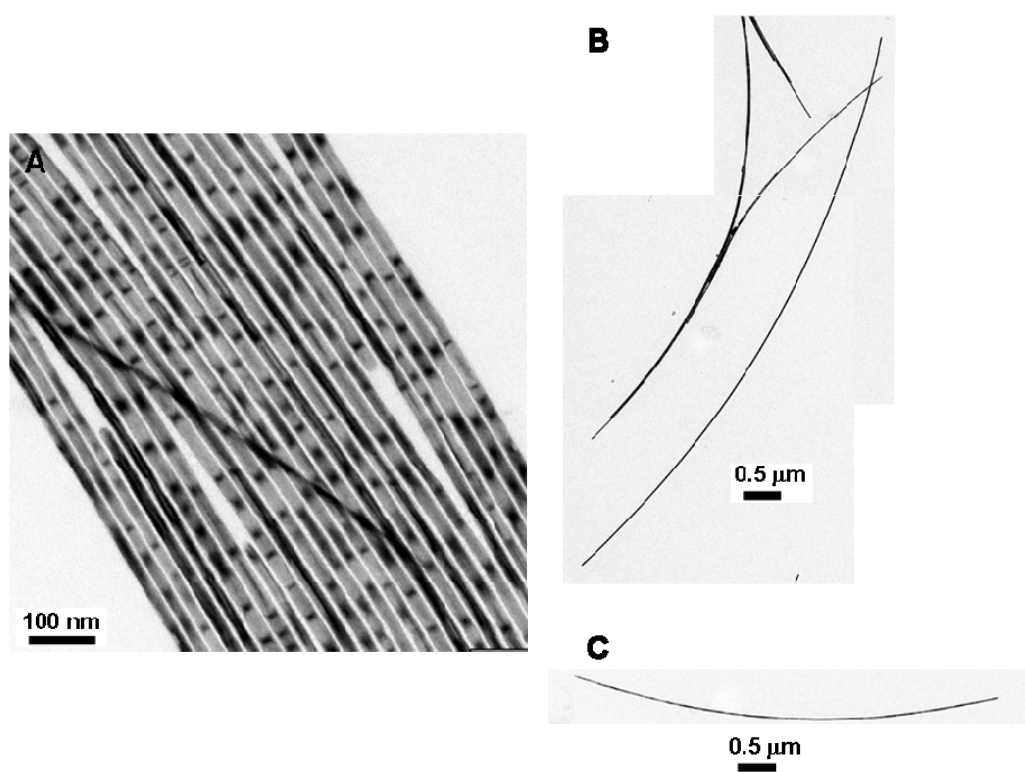

**Figure S4.** Additional images for ultralong Cu nanowires. (A) TEM of the Cu nanowires. (B, C) TEM images of several individual Cu nanowires.
